# Supplementary material
Source: PubMed Central journal article supplement (PMC3039333)

# Figure S1

**A.**

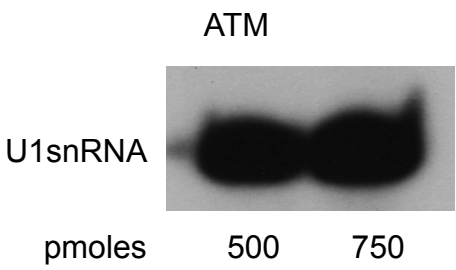

**B.**

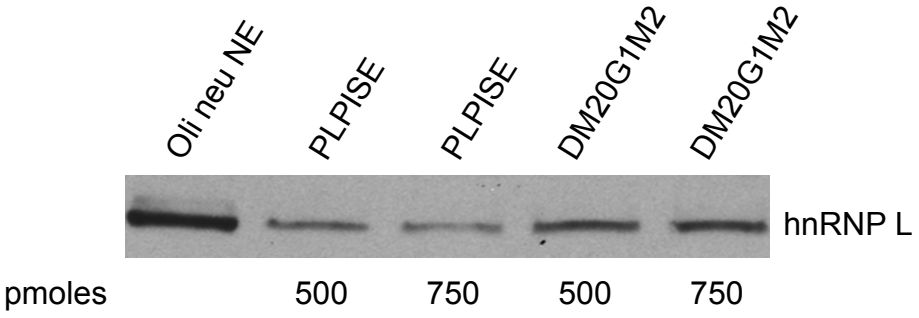

Supplement: supp_M110.199927_jbc.M110.199927-1.pdf [file supp_M110.199927_jbc.M110.199927-1.pdf]
